# Supplementary material for: Relationship between Metabolic Syndrome and Hearing Loss: Korea National Health and Nutritional Survey
Source: PubMed Central journal article supplement — Korean J Fam Med. 2020 Jun 11;42(1):53–8. doi: 10.4082/kjfm.19.0131 (PMC7884893; doi:10.4082/kjfm.19.0131), 2020-06-11
Supplement: kjfm-19-0131-suppl1.pdf [file kjfm-19-0131-suppl1.pdf]

**Supplementary Table 1.** Baseline characteristics of study population by noise exposure

| Characteristic                               | Total (n=10,356) | Noise exposure group (n=3,217) | No noise exposure group (n=7,139) | P-value | R <sup>2</sup> (%) |
|----------------------------------------------|------------------|--------------------------------|-----------------------------------|---------|--------------------|
| Sex                                          |                  |                                |                                   | <0.0001 |                    |
| Male                                         | 4,509 (49.0)     | 2,337 (76.4)                   | 2,172 (34.3)                      |         |                    |
| Female                                       | 5,847 (51.0)     | 880 (23.6)                     | 4,967 (65.7)                      |         |                    |
| Age (y)                                      | 58.0±11.1        | 54.1±24.5                      | 55.4±28.4                         | 0.0002  |                    |
| 40–49                                        | 2,801 (38.1)     | 932 (41.1)                     | 1,869 (36.5)                      |         |                    |
| 50–54                                        | 1,573 (17.8)     | 474 (17.4)                     | 1,099 (18.0)                      |         |                    |
| 55–59                                        | 1,404 (13.3)     | 434 (13.6)                     | 970 (13.1)                        |         |                    |
| 60–64                                        | 1,364 (10.1)     | 436 (9.8)                      | 928 (10.2)                        |         |                    |
| ≥65                                          | 3,214 (20.7)     | 941 (18.0)                     | 2,273 (22.2)                      |         |                    |
| BMI (kg/m <sup>2</sup> )*                    | 24.0±3.1         | 24.2±7.6                       | 24.0±9.4                          | 0.1236  | 0.0471             |
| Waist circumference (cm)                     | 82.8±9.1         | 84.2±22.5                      | 82.2±26.6                         | <0.0001 | 1.0410             |
| Blood pressure (mm Hg)                       |                  |                                |                                   |         |                    |
| Systolic blood pressure                      | 124.0±17.0       | 123.7±39.8                     | 122.3±46.1                        | 0.0032  | 0.1442             |
| Diastolic blood pressure                     | 77.7±10.1        | 79.8±28.1                      | 77.6±31.4                         | <0.0001 | 1.0230             |
| Fasting plasma glucose (mg/dL)               | 101.2±23.4       | 101.1±51.4                     | 100.9±64.5                        | 0.6516  | 0.0032             |
| Triglyceride (mg/dL)                         | 140.6±104.5      | 155.1±297.5                    | 141.7±368.8                       | 0.0003  | 0.2910             |
| High-density lipoprotein cholesterol (mg/dL) | 48.7±11.8        | 47.3±25.7                      | 49.2±30.1                         | <0.0001 | 0.6264             |
| Household income <sup>†</sup>                |                  |                                |                                   | 0.0052  |                    |
| Lower class                                  | 2,654 (22.2)     | 751 (20.0)                     | 1,903 (23.3)                      |         |                    |
| Lower-middle                                 | 1,916 (19.4)     | 615 (19.6)                     | 1,301 (19.4)                      |         |                    |
| Middle                                       | 1,879 (19.7)     | 641 (22.0)                     | 1,238 (18.5)                      |         |                    |
| Upper-middle                                 | 1,679 (17.2)     | 544 (17.4)                     | 1,135 (17.0)                      |         |                    |
| Upper class                                  | 2,089 (20.0)     | 632 (19.9)                     | 1,457 (20.1)                      |         |                    |
| Education level <sup>‡</sup>                 |                  |                                |                                   | <0.0001 |                    |
| Elementary school                            | 3,420 (27.7)     | 925 (23.7)                     | 2,495 (29.9)                      |         |                    |
| Middle school                                | 1,542 (15.4)     | 494 (16.1)                     | 1,048 (15.0)                      |         |                    |
| High school                                  | 3,085 (33.2)     | 1,019 (35.3)                   | 2,066 (32.0)                      |         |                    |
| University                                   | 2,131 (21.8)     | 724 (23.3)                     | 1,407 (21.0)                      |         |                    |
| Smoking <sup>§</sup>                         |                  |                                |                                   | <0.0001 |                    |
| Non-smoker                                   | 6,176 (54.6)     | 1,190 (33.4)                   | 4,986 (66.0)                      |         |                    |
| Ex-smoker                                    | 2,165 (21.2)     | 1,056 (30.8)                   | 1,109 (16.0)                      |         |                    |
| Current smoker                               | 1,840 (22.4)     | 917 (34.2)                     | 923 (16.0)                        |         |                    |
| Alcohol consumption <sup>  </sup>            |                  |                                |                                   | <0.0001 |                    |
| Non-drinker                                  | 5,212 (45.3)     | 1,205 (34.0)                   | 4,007 (51.3)                      |         |                    |
| ≤1/wk                                        | 2,718 (27.5)     | 930 (28.7)                     | 1,788 (26.8)                      |         |                    |
| 2–3/wk                                       | 1,337 (15.5)     | 609 (21.7)                     | 728 (12.1)                        |         |                    |
| ≥4/wk                                        | 872 (9.6)        | 404 (13.7)                     | 468 (7.4)                         |         |                    |
| Regular physical activity <sup>¶</sup>       |                  |                                |                                   | 0.0006  |                    |
| Yes                                          | 4,673 (44.9)     | 1,549 (48.2)                   | 3,124 (43.1)                      |         |                    |
| No                                           | 5,505 (53.2)     | 1,614 (50.2)                   | 3,891 (54.9)                      |         |                    |

Values are presented as number (%) for categorical variables or mean±standard deviation for continuous variables.

BMI, body mass index.

\*Total number=10,342 (male 4,500, female 5,842); BMI couldn't be calculated for subjects without weight or height measurements. <sup>†</sup>Total number=10,217 (male 4,450, female 5,767); household income couldn't be obtained for missing or no answer. <sup>‡</sup>Total number=10,178 (male 4,432, female 5,746); education level couldn't be obtained for missing or no answer. <sup>§</sup>Total number=10,181 (male 4,432, female 5,749); smoking status couldn't be obtained for missing or no answer. <sup>||</sup>Total number=10,139 (male 4,414, female 5,725); alcohol consumption couldn't be obtained for missing or no answer. <sup>¶</sup>Total number=10,178 (male 4,431, female 5,747); regular physical activity status couldn't be obtained for missing or no answer.
