# Supplementary material for: Relationship between Metabolic Syndrome and Hearing Loss: Korea National Health and Nutritional Survey
Source: PubMed Central journal article supplement — Korean J Fam Med. 2020 Jun 11;42(1):53–8. doi: 10.4082/kjfm.19.0131 (PMC7884893; doi:10.4082/kjfm.19.0131), 2020-06-11
Supplement: kjfm-19-0131-suppl2.pdf [file kjfm-19-0131-suppl2.pdf]

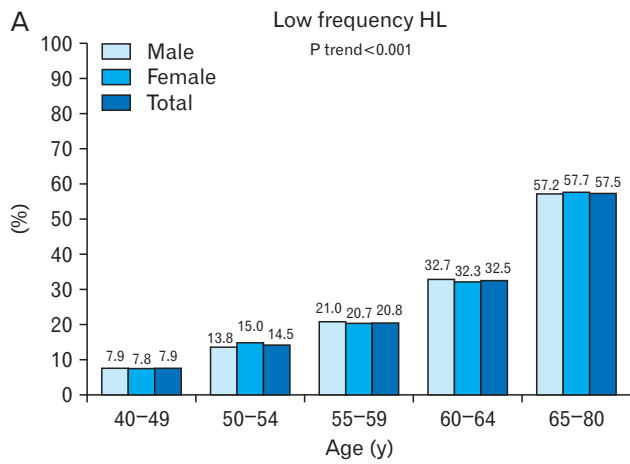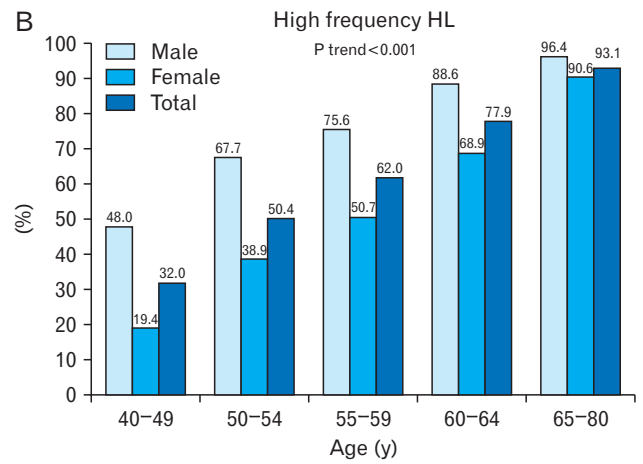

**Supplementary Figure 1.** Prevalence of both low-frequency HL (A) and high-frequency HL (B) according to age and sex. Data are presented as percentage of hearing loss among the total population of each age group. HL, hearing loss.
